# Supplementary material
Source: ML conference proceedings conference paper supplement (https://openreview.net/forum?id=S8bmkHXqgT)
Supplement: supplementary_material [file Hypernetwork.pdf › IPE-main/IPE-main/resource/Hypernetwork.pdf]

## Distribution Description to Ray Preference Mapping

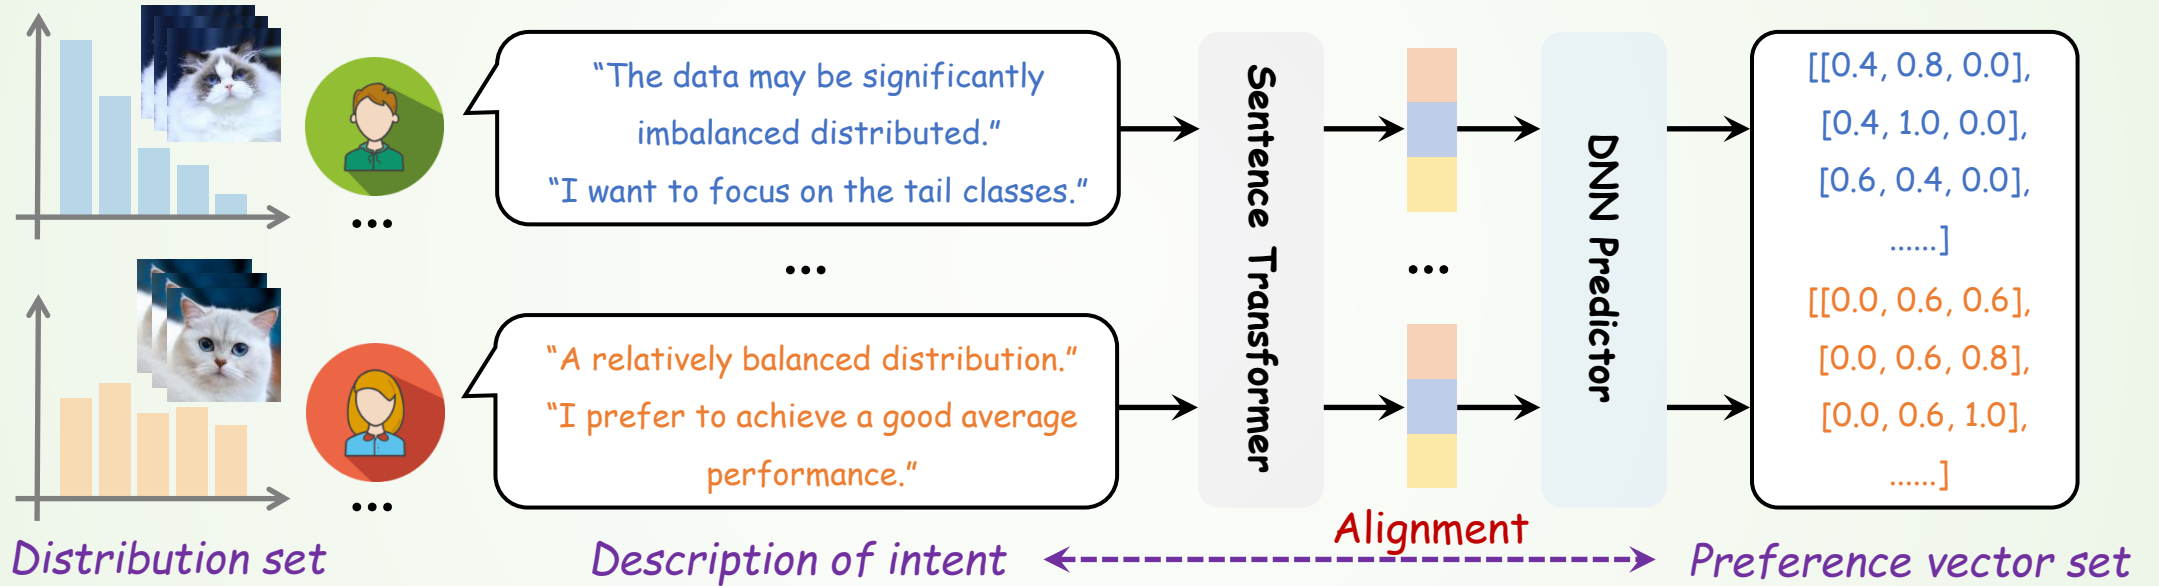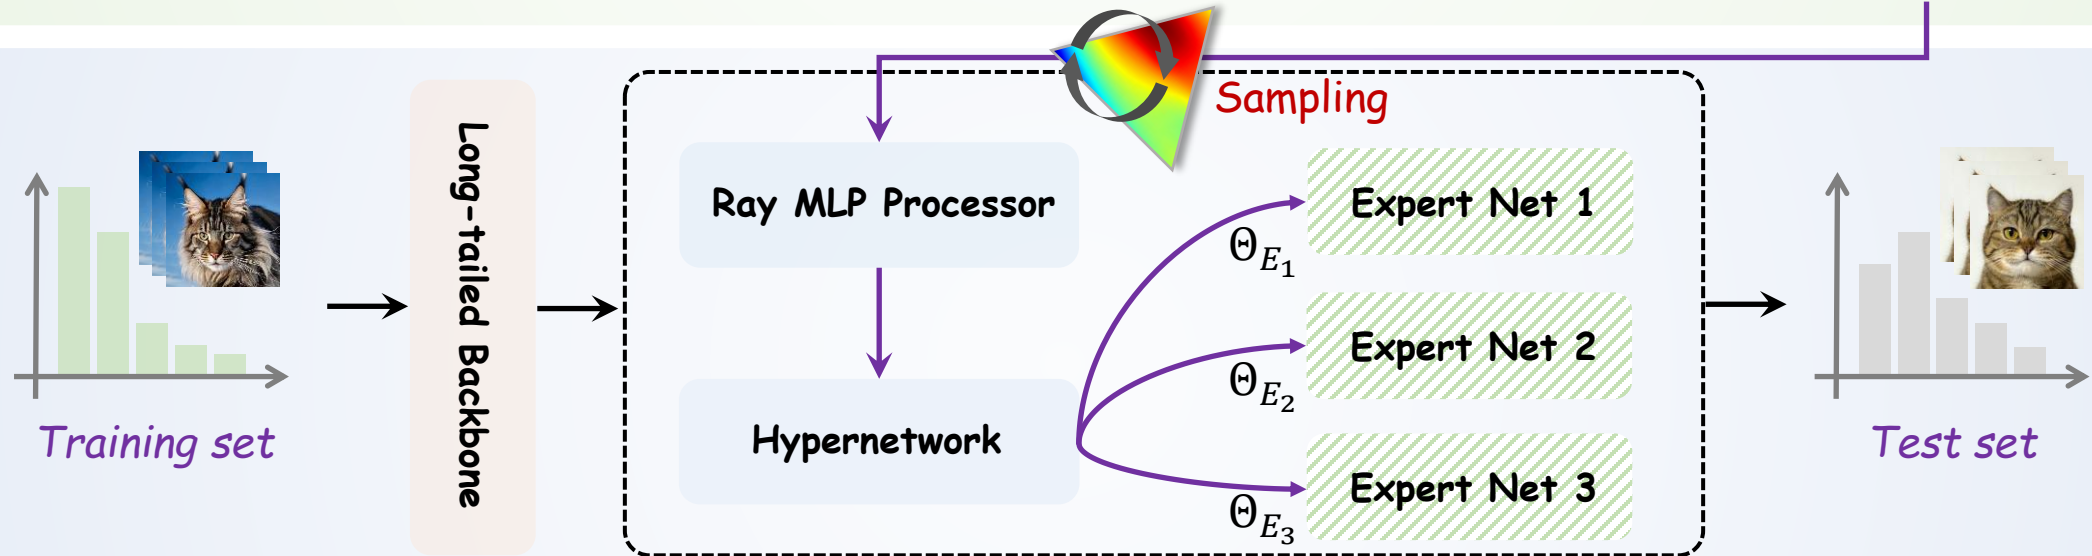

## Long-tailed Hypernetwork & Expert System Training
